## CORRECTION

# Correction: Unique and non-redundant function of *csf1r* paralogues in regulation and evolution of post-embryonic development of the zebrafish

**Joana Caetano-Lopes, Katrin Henke, Katia Urso, Jeffrey Duryea, Julia F. Charles, Matthew L. Warman and Matthew P. Harris**

There were errors in *Development* (2020) **147**, dev181834 (doi:10.1242/dev.181834).

In the supplementary information, some of the figures and legends were incorrectly matched.

In the original version, legends to Figs S2-S7 were presented in the correct order, but the figures themselves were in the following order: Fig. S6, Fig. S4, Fig. S2, Fig. S7, Fig. S5 and Fig. S3.

The online supplementary PDF has been updated.

We apologise to the authors and readers for this error, and for any inconvenience it may have caused.
